# Supplementary material
Source: Springer Nature journal article supplement (https://www.springermedizin.de/resource/supplementary/12872_2010_335_MOESM3_ESM.pdf/9429724)

## Females

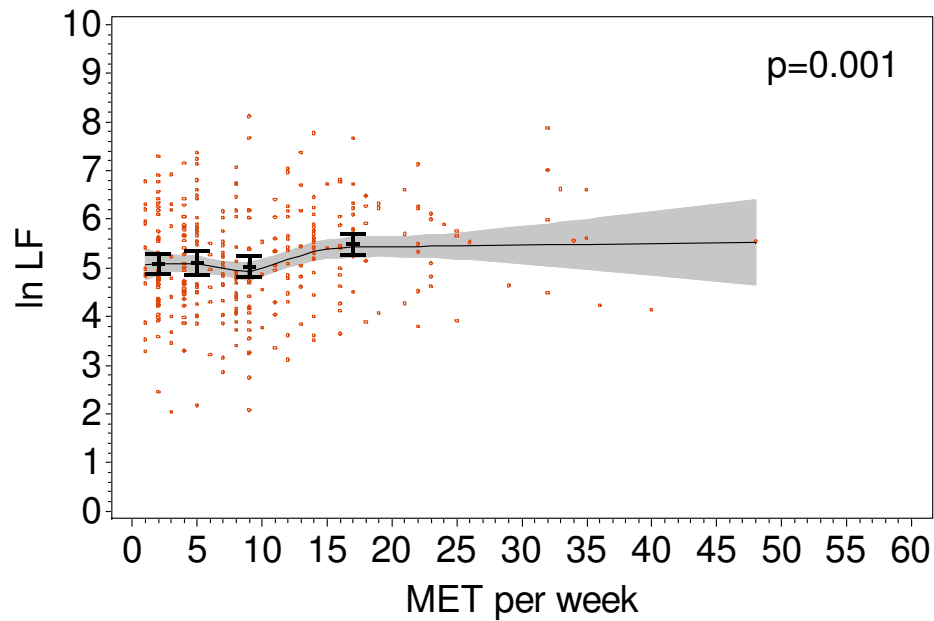

## Males

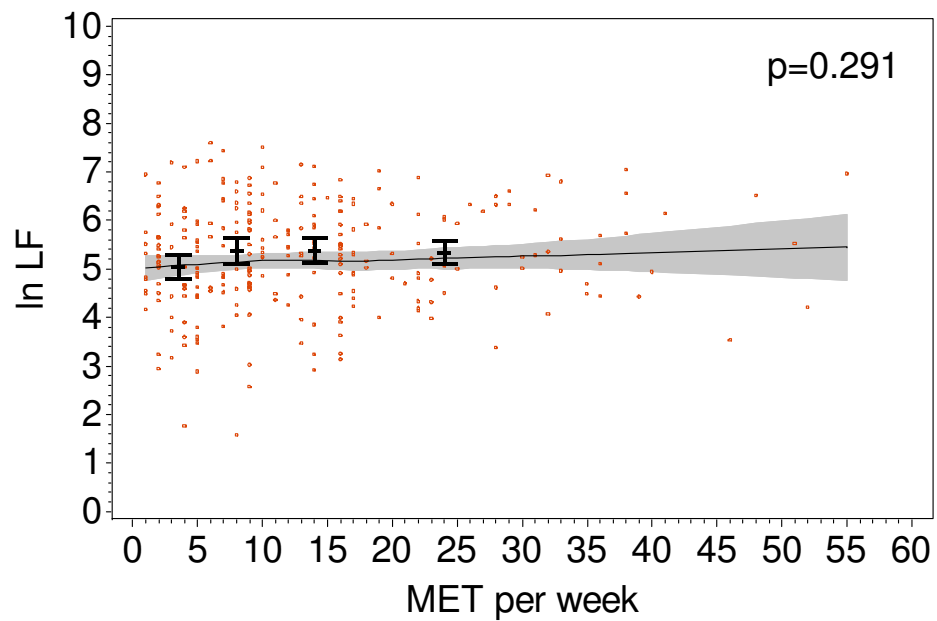

Supplement: MOESM3 [file 9429724]
